# Supplementary material
Source: MDPI journal article supplement (https://www.mdpi.com/2072-4292/14/23/5977)
Supplement: s1 [file s1]

| Data partition                                                                                         | $n$        |            | minimum–maximum |            | range      |            | median     |            | IQR        |            | QCV        |            | skewness   |            | kurtosis   |            |
|--------------------------------------------------------------------------------------------------------|------------|------------|-----------------|------------|------------|------------|------------|------------|------------|------------|------------|------------|------------|------------|------------|------------|
|                                                                                                        | full-frame | push-broom | full-frame      | push-broom | full-frame | push-broom | full-frame | push-broom | full-frame | push-broom | full-frame | push-broom | full-frame | push-broom | full-frame | push-broom |
| <i>Dry matter (<math>g\ m^{-2}</math>)</i>                                                             |            |            |                 |            |            |            |            |            |            |            |            |            |            |            |            |            |
| training                                                                                               | 107        | 107        | 74–227          | 74–227     | 154        | 154        | 120        | 121        | 26         | 28         | 0.21       | 0.23       | 1.48       | 1.05       | 4.26       | 3.04       |
| validation                                                                                             | 18         | 18         | 75–158          | 106–183    | 83         | 76         | 121        | 136        | 62         | 34         | 0.51       | 0.25       | −0.15      | 0.35       | −1.81      | −0.61      |
| testing                                                                                                | 38         | 38         | 77–169          | 78–157     | 92         | 79         | 124        | 120        | 23         | 22         | 0.19       | 0.18       | −0.09      | −0.23      | 0.51       | −0.27      |
| <i>Nitrogen content (% <math>pp</math>)</i>                                                            |            |            |                 |            |            |            |            |            |            |            |            |            |            |            |            |            |
| training                                                                                               | 107        | 107        | 2.7–4.2         | 2.7–4.2    | 1.5        | 1.5        | 3.6        | 3.6        | 0.53       | 0.48       | 0.15       | 0.13       | −0.20      | −0.30      | −0.74      | −0.49      |
| validation                                                                                             | 18         | 18         | 3.3–4.0         | 3.2–4.0    | 0.7        | 0.8        | 3.7        | 3.7        | 0.40       | 0.33       | 0.11       | 0.09       | −0.12      | −0.48      | −1.12      | −0.62      |
| testing                                                                                                | 38         | 38         | 3.4–4.2         | 3.2–4.2    | 0.8        | 1.0        | 3.8        | 3.8        | 0.26       | 0.33       | 0.07       | 0.09       | −0.02      | −0.44      | −0.28      | −0.17      |
| <i>Nitrogen uptake (<math>g\ m^{-2}</math>)</i>                                                        |            |            |                 |            |            |            |            |            |            |            |            |            |            |            |            |            |
| training                                                                                               | 107        | 107        | 2.6–8.7         | 2.5–8.7    | 6.1        | 6.3        | 4.1        | 4.3        | 1.28       | 1.34       | 0.31       | 0.31       | 1.45       | 1.26       | 3.09       | 2.66       |
| validation                                                                                             | 18         | 18         | 2.5–6.2         | 3.5–6.7    | 3.7        | 3.1        | 4.4        | 5.1        | 2.26       | 1.15       | 0.51       | 0.23       | −0.04      | −0.18      | −1.67      | −0.67      |
| testing                                                                                                | 38         | 38         | 3.1–6.6         | 3.1–5.9    | 3.6        | 2.8        | 4.7        | 4.4        | 0.88       | 1.36       | 0.19       | 0.31       | 0.12       | 0.18       | 0.54       | −1.10      |
| IQR — interquartile range, QCV — quartile based coefficient of variation. $QCV = \frac{IQR}{median}$ . |            |            |                 |            |            |            |            |            |            |            |            |            |            |            |            |            |
