# Supplementary material
Source: MDPI journal article supplement (https://www.mdpi.com/2072-4292/14/23/5977)

Input features not transformed    Input features transformed

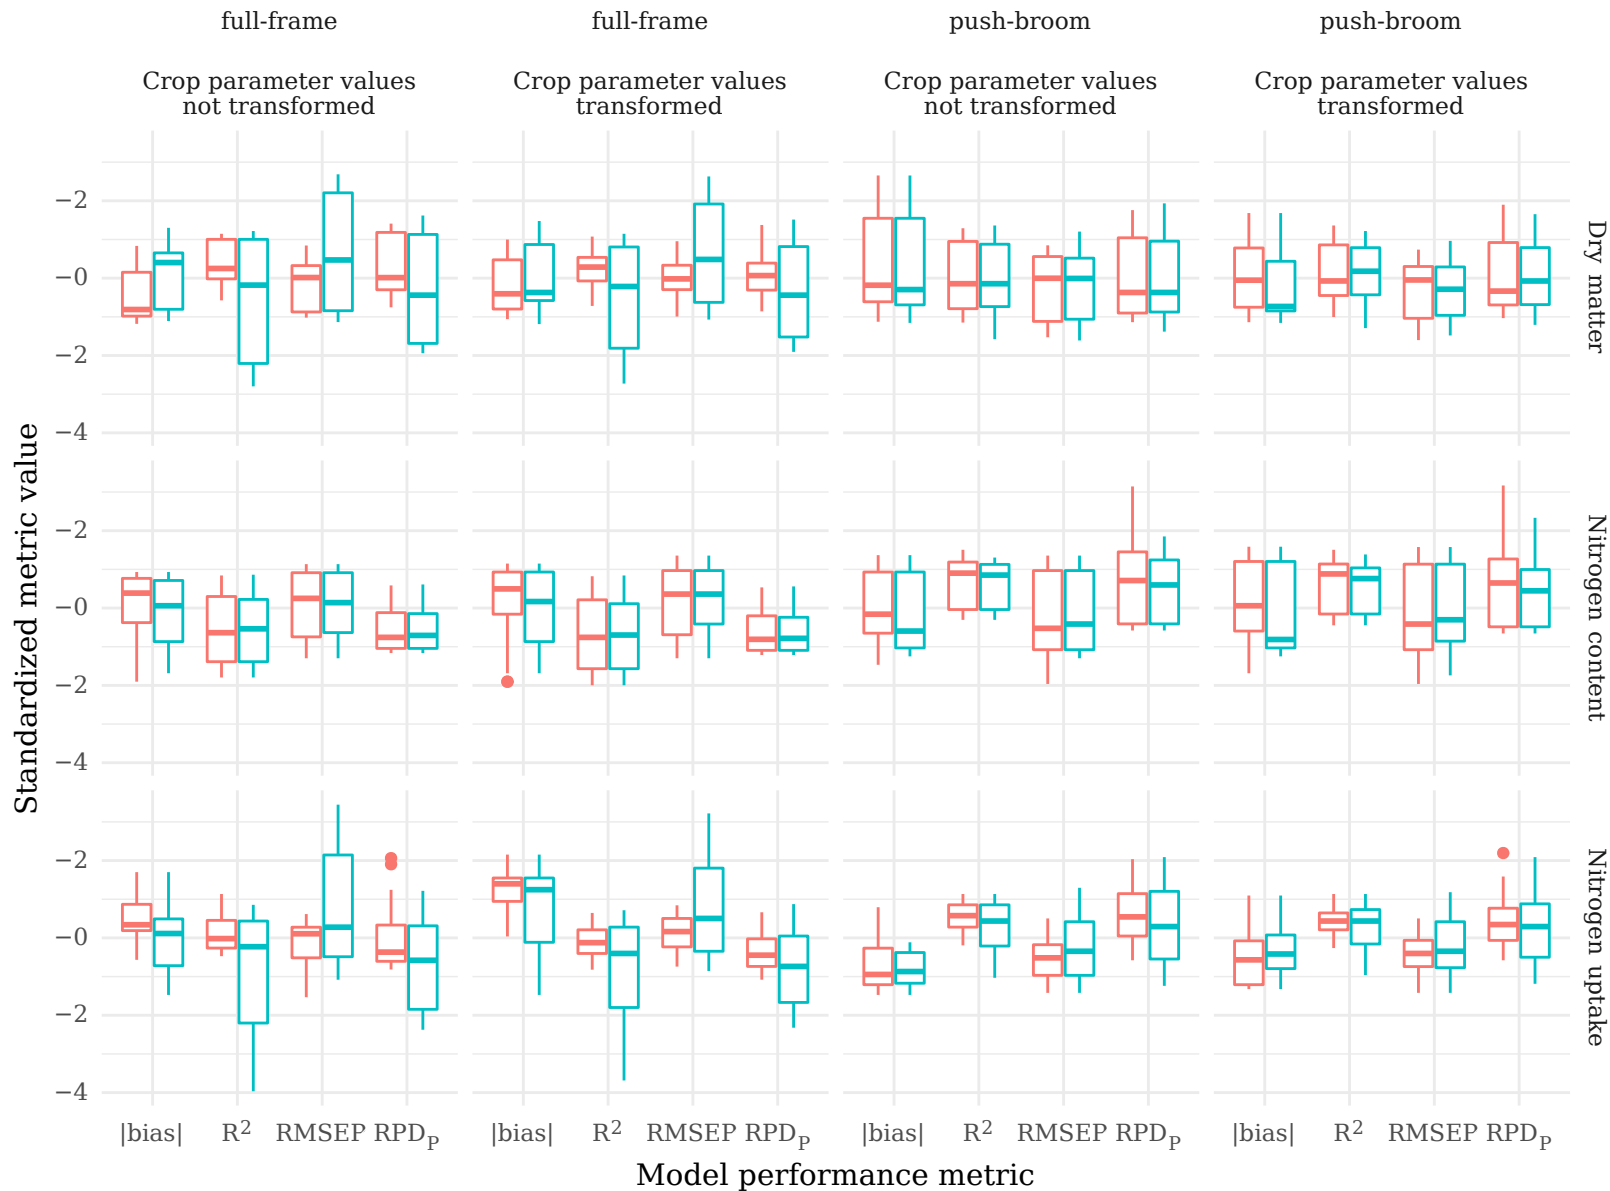

Supplement: s1 [file s1]

$EC_a$  (mSm $^{-1}$ )

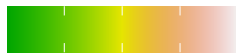

40

60

80

2005

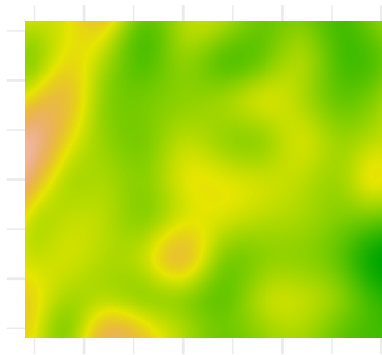

2022

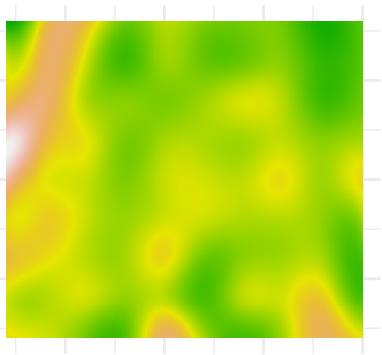

Supplement: s1 [file s1]

# Nitrogen uptake ( $\text{gm}^{-2}$ )

Data partition ● training ● validation ● testing

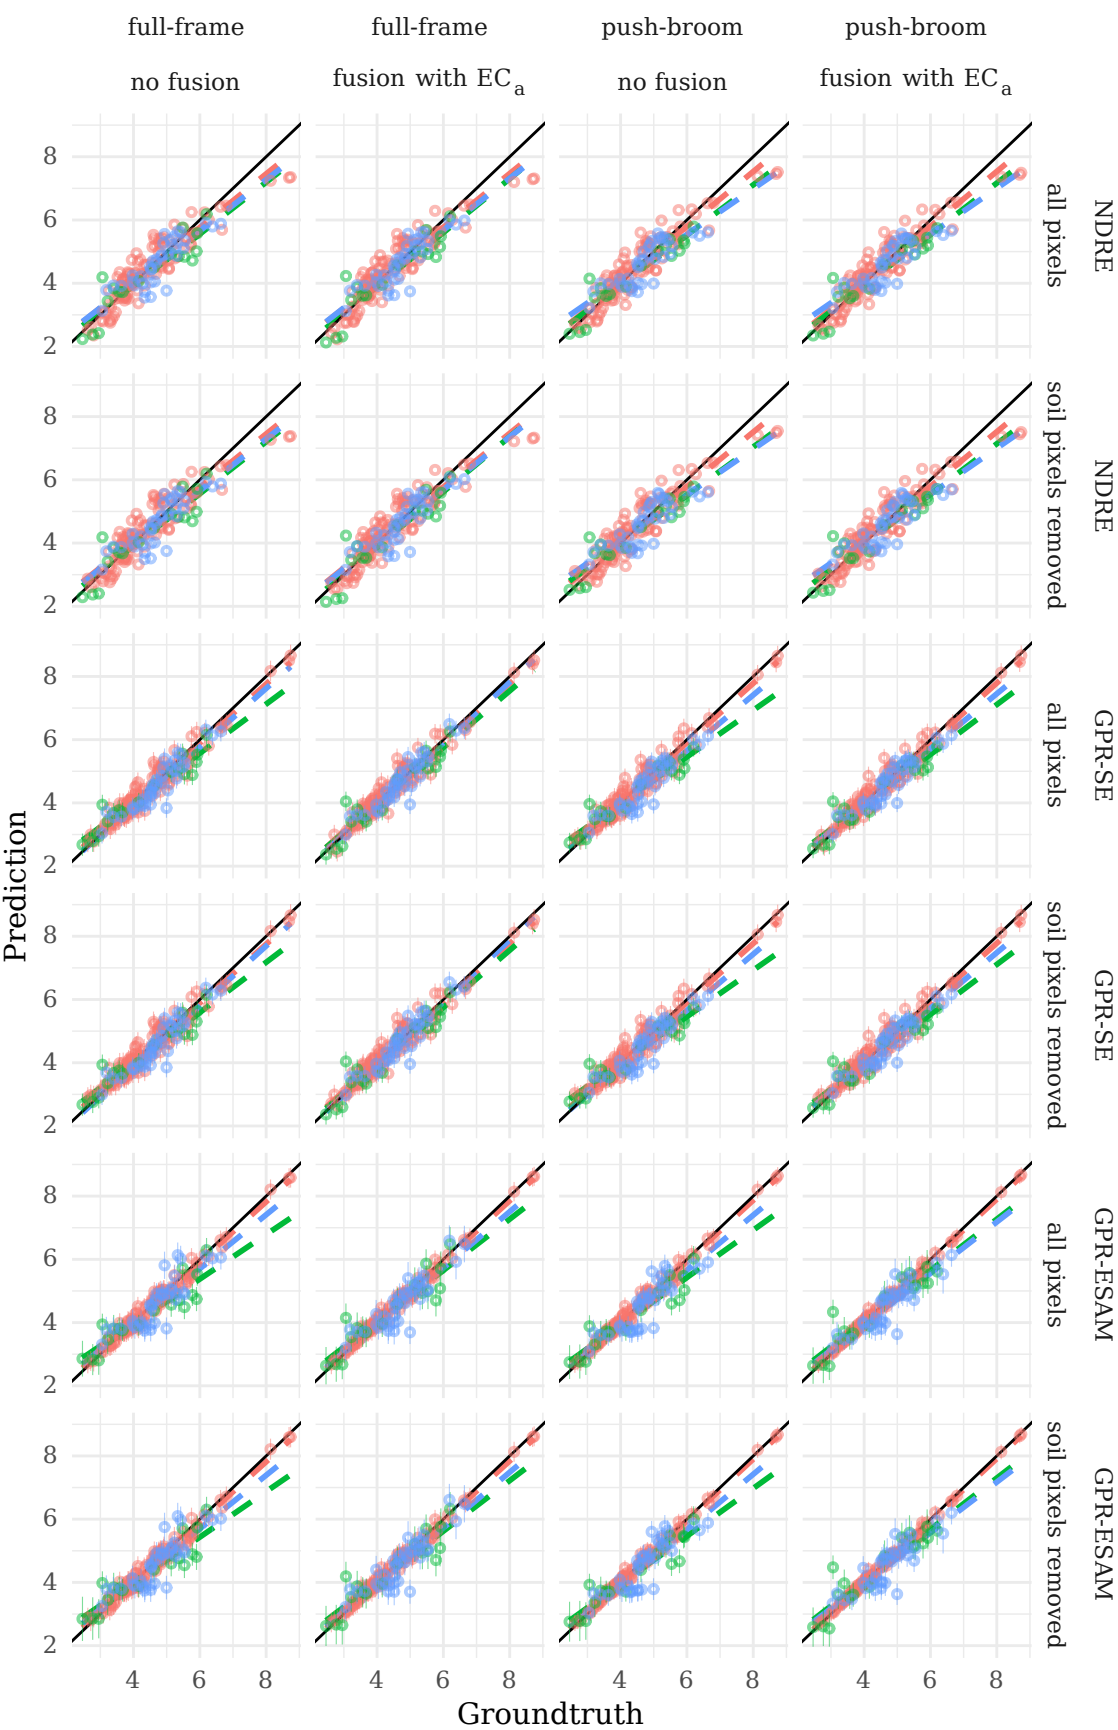

Supplement: s1 [file s1]

## Dry matter ( $\text{gm}^{-2}$ )

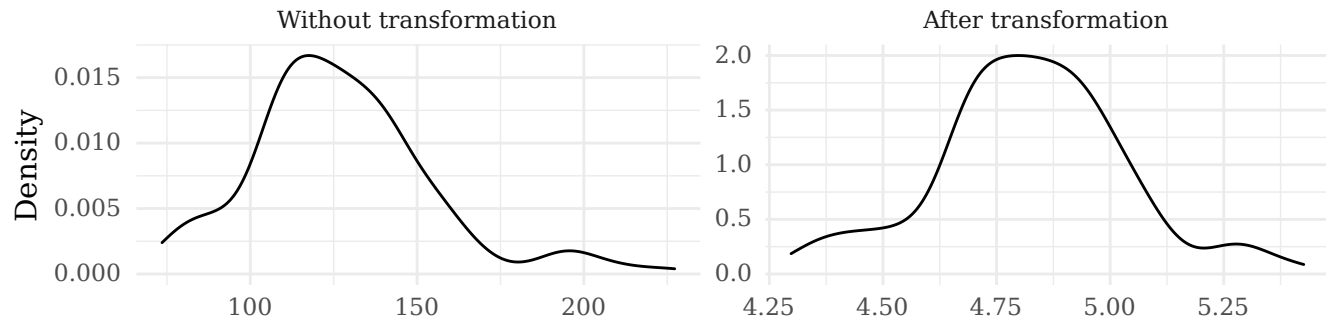

## Nitrogen content (%)

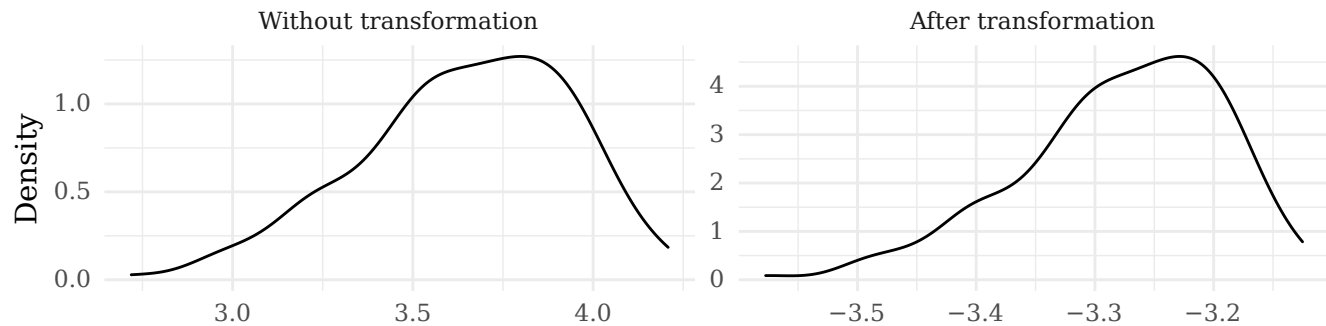

## Nitrogen uptake ( $\text{gm}^{-2}$ )

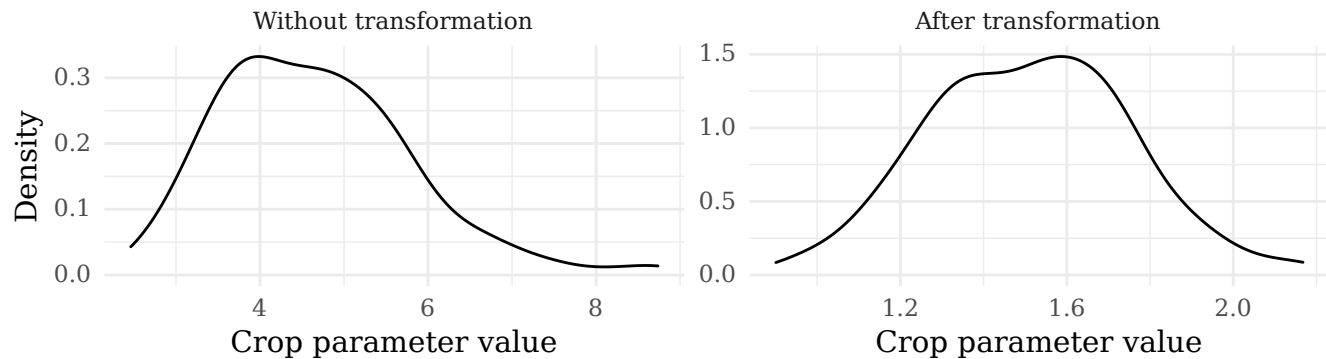

Supplement: s1 [file s1]
